# Supplementary material for: Reduced Virulence of an Introduced Forest Pathogen over 50 Years
Source: MDPI journal article supplement (doi:10.3390/microorganisms7100420), 2019-10-05
Supplement: s1 [file s1]

## Supporting Information Figure S2

### Evidence for duplication and deletion in *D. septosporum* genomes

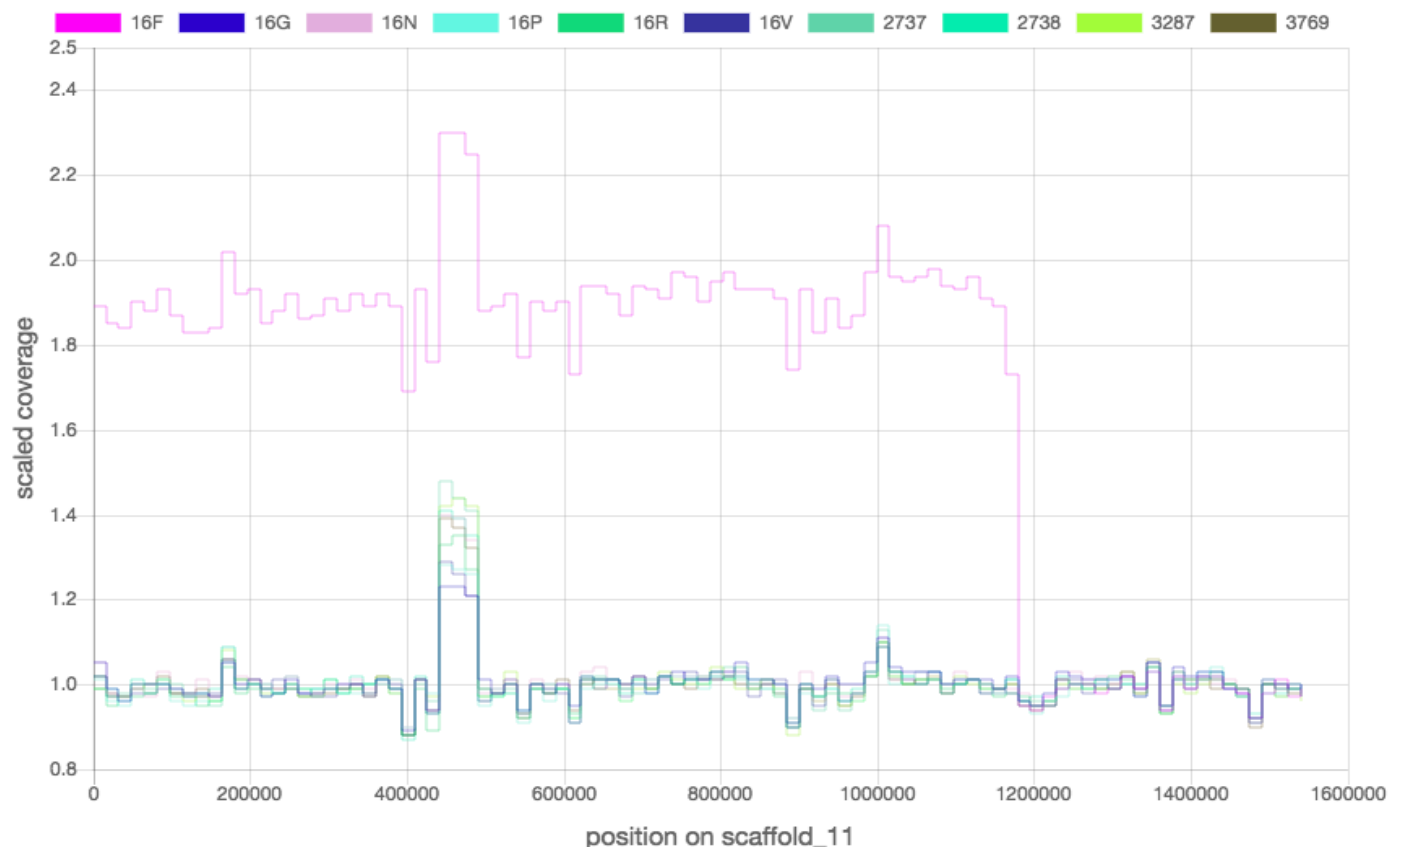

**(a)** Scaled read coverage of all isolates for chromosome 11 suggested that 16F has a duplication.

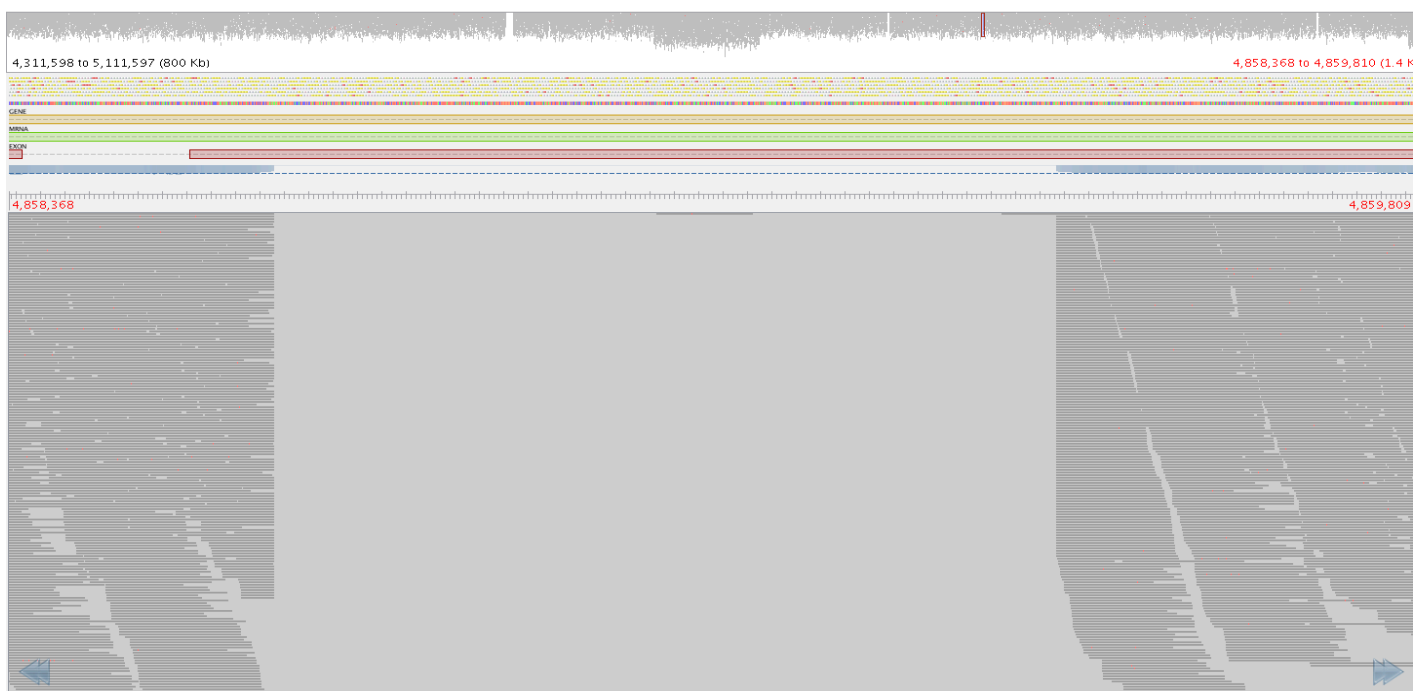

**(b)** A suspected deletion, found in isolates 2738 and 3769. Reads on either side of the suspected deletion are paired, providing strong evidence for the existence of a deletion. The deletion is approximately 1000 bases in length and falls within a gene encoding a hypothetical protein (protein ID 68999) on chromosome 1 (4858500-4859438).
