# Supplementary material for: Reduced Virulence of an Introduced Forest Pathogen over 50 Years
Source: MDPI journal article supplement (doi:10.3390/microorganisms7100420), 2019-10-05

**Fig. S1** Phylogeny of ten New Zealand isolates and five global isolates of *D. septosporum*

The neighbour-joining phylogeny was prepared with whole-genome filtered SNPs (compared to *D. septosporum* NZE10). The New Zealand isolates are grouped in a clade distinct from isolates from five other countries (COL Colombia, ECU Ecuador, CAN Canada, ALP3 Germany, RUS1 Russia; Bradshaw et al 2019 Molecular Plant Pathology 20: 784-799) and there is much lower genetic diversity between the New Zealand isolates than between the 'other country' isolates. Numbers represent percentages of 5000 bootstrap replications.

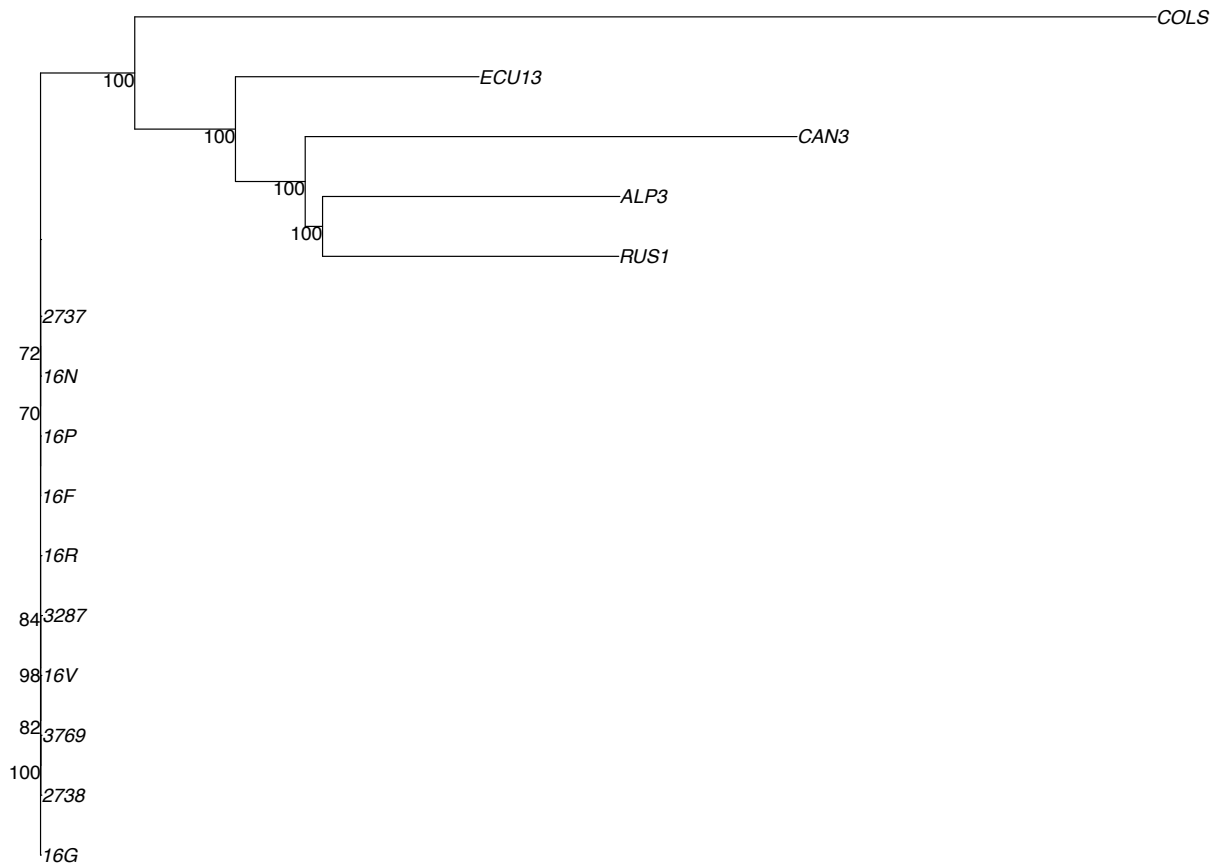

Supplement: s1 [file s1]
