# Supplementary material for: Reduced Virulence of an Introduced Forest Pathogen over 50 Years
Source: Microorganisms. 2019 Oct 5;7(10):420. doi: 10.3390/microorganisms7100420 (PMC6843257; doi:10.3390/microorganisms7100420)
Supplement: Supplementary file 1 [file microorganisms-07-00420-s001.zip]

Archive with 8 entries (8 files):
- Figure S1.pdf
- Figure S2.pdf
- Figure S3.pdf
- Table_S1.docx
- Table_S2.xlsx
- Table_S3.docx
- Table_S4.xlsx
- Table_S5.xlsx
