# Supplementary material for: Reduced Virulence of an Introduced Forest Pathogen over 50 Years
Source: Microorganisms. 2019 Oct 5;7(10):420. doi: 10.3390/microorganisms7100420 (PMC6843257; doi:10.3390/microorganisms7100420)
Supplement: Supplementary file 1 [file microorganisms-07-00420-s001.zip › Table_S2.xlsx]

## Sheet: S2_substitution_rates
Table S2 Substitution rates = (Number of filtered SNP differences/number of mapped bases)/difference in date of collection (years)
Pairwise 'substitution rates':
Strain	16G	16N	16P	16R	16V	2737	2738	3287	3769
16F	2.66921e-06	1.28391e-06	1.0785e-06	2.72466e-07	2.40021e-07	1.5241e-07	1.65383e-07	2.21782e-07	1.51354e-07
16G		3.1678e-06	2.7591e-06	3.59954e-07	3.01544e-07	2.06717e-07	2.05031e-07	2.675e-07	1.89114e-07
16N			NA	4.31622e-07	3.70055e-07	2.63274e-07	2.56112e-07	3.13858e-07	2.24007e-07
16P				4.0155e-07	3.40881e-07	2.20294e-07	2.32833e-07	2.98213e-07	2.05786e-07
16R					3.61782e-06	7.10539e-07	7.37107e-07	8.03669e-07	5.1534e-07
16V						8.79351e-07	7.4704e-07	8.83228e-07	5.04443e-07
2737							NA	1.17876e-05	1.64307e-06
2738								1.04746e-05	1.30348e-06
3287									2.24324e-06
3769		NA - not applicable as isolates collected on the same day
OVERALL SUBSTITUTION RATES:			1960s to 1990s/2000s		1960s to 2000s only
		Average:	2.62157e-07		2.23354e-07
		SD:	7.6889e-08		4.7738e-08
Information used to calculate substitution rates:
1. number of filtered SNP differences between strains
	16G	16N	16P	16R	16V	2737	2738	3287	3769		mean		% of mapped bases
16F	129	150	126	213	209	188	204	281	217		190.778	16F	0.000634401
16G		217	189	264	248	245	243	326	262
16N			202	287	279	294	286	361	295
16P				267	257	246	260	343	271
16R					322	321	333	390	336
16V						319	271	350	284
2737							318	395	329
2738								351	261
3287									374		352.333	3287	0.00117163
3769
2. number of mapped bases and difference in date of collection
Isolate	Collection Date	Number of mapped bases	Arbitrary date	Days in between the two dates
16F	1965-10-13	30071510	1950-01-01	5764
16G	1967-05-23	30072056	1950-01-01	6351
16N	1969-09-01	30072781	1950-01-01	7183
16P	1969-09-01	30071824	1950-01-01	7183
16R	1991-10-12	30072629	1950-01-01	15259
16V	1994-09-27	30072927	1950-01-01	16340
2737	2006-10-20	30072744	1950-01-01	20746
2738	2006-10-20	30072278	1950-01-01	20746
3287	2007-12-01	30072070	1950-01-01	21153
3769	2013-06-17	30071799	1950-01-01	23178
3. Example calculation:
comparing 16F and 2737
mean number of mapped bases			30072127
difference in collection date (years)			41.0185
substitution rate			1.5241e-07
