# Supplementary material for: Reduced Virulence of an Introduced Forest Pathogen over 50 Years
Source: Microorganisms. 2019 Oct 5;7(10):420. doi: 10.3390/microorganisms7100420 (PMC6843257; doi:10.3390/microorganisms7100420)
Supplement: Supplementary file 1 [file microorganisms-07-00420-s001.zip › Table_S4.xlsx]

## Sheet: Phenotype data
Table S4. Phenotype data for Dothistroma septosporum isolates
	1960s				1990s		2000s
Year	1965	1967	1969	1969	1991	1994	2006	2006	2007	2013	2005		1960s	1990s	2000s
Isolate	16F	16G	16N	16P	16R	16V	2737	2738	3287	3769	NZE10		mean SD	mean SD	mean SD
Dothistromin ng/mg DW
rep1	92.7371	22.1863	50.4919	57.3046	2.0127	8.17078	11.4204	7.09986	6.12387	10.2902	10.5436
rep2	70.3025	25.7281	76.3478	50.298	4.19555	6.16698	19.3759	8.87179	8.28717	13.1696	11.8915
rep3	55.5296	24.0791	64.7524	59.4323	4.94908	5.84159	13.8649	8.92427	7.89451	14.5346	7.02233
mean	72.8564	23.9978	63.8641	55.6783	3.71911	6.72645	14.8871	8.29864	7.43518	12.6648	9.81915		54.0992	5.22278	10.621
SD	18.7348	1.77229	12.9508	4.7794	1.52506	1.26136	4.07508	1.03851	1.15248	2.16676	2.51413		21.6516	2.06881	3.54304
Growth 1 (mm/day) 0 Cu
rep1	0.519231	0.555	0.657692	0.709615	0.474615	0.850769	0.680385	0.641923	0.705	0.736154	0.657692
rep2	0.488462	0.571538	0.631923	0.696154	0.615385	0.852308	0.634615	0.649231	0.686923	0.802308	0.747308
rep3	0.454615	0.555769	0.696154	0.659231	0.495	0.887308	0.756538	0.630769	0.69	0.726154	0.609615
rep4	0.523462	0.568077	0.642308	0.692692	0.605	0.831538	0.663462	0.602692	0.6775	0.755769	0.747692
rep5	0.504231	0.591154	0.698462	0.705385	0.477692	0.879231	0.720385	0.644231	0.701923	0.735385	0.677308
rep6	0.529615	0.563462	0.657692	0.683462	0.622692	0.839231	0.737692	0.620385	0.669615	0.759231	0.718077
mean	0.503269	0.5675	0.664038	0.69109	0.548397	0.856731	0.698846	0.631538	0.688494	0.7525	0.692949		0.606474	0.702564	0.692865
SD	0.0280856	0.013314	0.02757	0.0181601	0.0728082	0.0220781	0.0469464	0.0175445	0.0136733	0.0275356	0.0548002		0.079712	0.168995	0.0513719
Growth 1 (mm/day) 50 Cu
rep1	0.482692	0.546923	0.577308	0.601923	0.498077	0.514231	0.581923	0.520769	0.555769	0.518462	0.581538
rep2	0.513077	0.555769	0.606923	0.671154	0.453077	0.675769	0.556923	0.472308	0.571154	0.5275	0.581154
rep3	0.431923	0.526538	0.560385	0.624231	0.453846	0.521154	0.526154	0.524231	0.498462	0.535385	0.5875
rep4	0.534038	0.531154	0.598077	0.651538	0.425	0.656538	0.541538	0.504423	0.5875	0.527692	0.58
rep5	0.473462	0.509231	0.5425	0.650385	0.510769	0.510769	0.614615	0.515	0.568846	0.596923	0.601923
rep6	0.482308	0.527692	0.628077	0.667692	0.468846	0.733077	0.548077	0.496731	0.569808	0.490769	0.575
mean	0.48625	0.532885	0.585545	0.644487	0.468269	0.601923	0.561538	0.533698	0.584619	0.606555	0.584519		0.562292	0.535096	0.574186
SD	0.0350616	0.0164348	0.0315493	0.0266688	0.0316422	0.0981428	0.0318976	0.162092	0.177884	0.201332	0.00941306		0.0658369	0.0985145	0.0372908
Growth 1 ratio 50/0 Cu
rep1	0.92963	0.985447	0.877778	0.848238	1.04943	0.60443	0.855285	0.811264	0.788325	0.704284	0.884211
rep2	1.05039	0.972409	0.960438	0.964088	0.73625	0.79287	0.877576	0.727488	0.831467	0.657478	0.777663
rep3	0.950085	0.947405	0.804972	0.946908	0.916861	0.587343	0.695475	0.831098	0.722408	0.737288	0.963722
rep4	1.02021	0.935003	0.931138	0.940589	0.702479	0.789547	0.816232	0.83695	0.867159	0.698219	0.77572
rep5	0.938978	0.861418	0.776707	0.922028	1.06924	0.580927	0.853177	0.799403	0.810411	0.811715	0.8887
rep6	0.910675	0.936519	0.954971	0.976927	0.752934	0.873511	0.742961	0.800682	0.850948	0.646403	0.80075
mean	0.966661	0.9397	0.884334	0.93313	0.8712	0.704771	0.806784	0.801147	0.811786	0.709231	0.848461		0.930956	0.787986	0.795482
SD	0.0555429	0.043318	0.0786089	0.0457207	0.163547	0.128543	0.0722058	0.0392686	0.0520151	0.0601027	0.0758449		0.0616208	0.164993	0.0738498
Growth 2 (mm/day) 0 Cu
rep1	0.680769	0.513462	0.721154	0.803846	0.773077	0.736538	0.807692	0.55	0.898077	0.621154	0.730769
rep2	0.653846	0.534615	0.669231	0.703846	0.801923	0.75	0.776923	0.584615	0.888462		0.742308
rep3	0.688462	0.548077	0.723077	0.767308	0.792308	0.819231	0.763462	0.571154	0.894231	0.582692	0.682692
rep4	0.611538	0.567308	0.734615	0.751923	0.825	0.686538	0.771154	0.594231	0.905769	0.557692	0.725
rep5	0.628846	0.534615	0.719231	0.728846	0.857692	0.665385	0.763462	0.805769	0.901923	0.673077	0.696154
rep6	0.628846	0.540385	0.782692	0.755769	0.819231	0.675	0.763462	0.815385	0.926923	0.740385	0.711538
mean	0.648718	0.539744	0.725	0.751923	0.811538	0.722115	0.774359	0.653526	0.902564	0.635	0.714744		0.666346	0.766827	0.736038
SD	0.0310007	0.0177368	0.0362845	0.0340336	0.0293671	0.0585165	0.0172292	0.122592	0.0133604	0.0732463	0.0223827		0.0888008	0.0642598	0.1151
Growth 2 (mm/day) 100 Cu
rep1	0.548077	0.536538	0.496154	0.553846	0.576923	0.671154	0.573077	0.532692	0.676923	0.611538	0.596154
rep2	0.548077	0.511538	0.503846	0.553846	0.546154	0.661538	0.673077	0.526923	0.684615		0.701923
rep3	0.586538	0.498077	0.526923	0.528846	0.526923	0.653846	0.625	0.526923	0.642308	0.615385	0.698077
rep4	0.578846	0.498077	0.526923	0.548077	0.573077	0.617308	0.653846	0.615385	0.584615	0.669231	0.601923
rep5	0.565385	0.446154	0.6	0.528846	0.528846	0.675	0.682692	0.55	0.580769	0.636538	0.598077
rep6	0.507692	0.484615	0.578846	0.509615	0.532692	0.628846	0.663462	0.567308	0.586538	0.675	0.619231
mean	0.555769	0.495833	0.538782	0.537179	0.547436	0.651282	0.645192	0.553205	0.625962	0.641538	0.635897		0.531891	0.599359	0.620359
SD	0.0282895	0.0300251	0.0416455	0.0177368	0.0224157	0.023353	0.0404989	0.0342862	0.0481883	0.0295616	0.0503342		0.0363727	0.0584584	0.0522613
Growth 2 ratio 100/0 Cu
rep1	0.805085	1.04494	0.688	0.688995	0.746269	0.911227	0.709524	0.968531	0.753747	0.98452	0.815789
rep2	0.838235	0.956835	0.752874	0.786885	0.681055	0.882051	0.866337	0.901316	0.770563		0.945596
rep3	0.851955	0.908772	0.728723	0.689223	0.665049	0.798122	0.81864	0.922559	0.71828	1.05611	1.02254
rep4	0.946541	0.877966	0.717277	0.7289	0.694639	0.89916	0.84788	1.0356	0.645435	1.2	0.830239
rep5	0.899083	0.834532	0.834225	0.725594	0.616592	1.01445	0.894207	0.682578	0.643923	0.945714	0.859116
rep6	0.807339	0.896797	0.739558	0.6743	0.650235	0.931624	0.869018	0.695755	0.63278	0.911688	0.87027
mean	0.884321	0.869765	0.763687	0.709598	0.653822	0.948411	0.870368	0.804644	0.640713	1.01913	0.853208		0.806843	0.801117	0.837613
SD	0.070765	0.0319322	0.0620952	0.0306135	0.0391468	0.0594507	0.0231926	0.200121	0.00691145	0.157556	0.0206593		0.0998269	0.132689	0.137837
Sporulation x106/ml
rep1	7.84722	2.33333	5.2381	4.38889	5	1.875	5.2	8	0.4	6.25	4
rep2	4.93056	2.6	9	5.95238	3.3	0.9	2.13333	3.42857	0.325	15.25	3.88889
rep3	4.5	4.9375	6.5	4.71429	3.7	1.41176	2.35294	5.42857	0.828571	16.9231	5.26316
mean	5.75926	3.29028	6.9127	5.01852	4	1.39559	3.22876	5.61905	0.517857	12.8077	4.38402		5.24519	2.69779	5.31147
SD	1.821	1.43275	1.91461	0.824952	0.888819	0.487701	1.71067	2.29166	0.271687	5.74041	0.763384		1.9113	1.56398	4.90603
% spore germination 0 Cu
rep1	30.5556	31.9672	30	40.1709	36.5079	48.2456	56.8	36.9231	54.8387	41.3043	42.029
rep2	44.3299	44	32.8244	42.0168	52.7778	53.5714	58.4906	52.2523	50.4587	45.082	50
rep3	36.1111	33.0189	30.5556	33.913	34.7107	26.2136	36.3636	42.0561	29.8387	34.965	36.4486
mean	36.9989	36.3287	31.1267	38.7003	41.3322	42.6769	50.5514	43.7438	45.0454	40.4505	42.8259		35.7886	42.0045	44.5234
SD	6.92995	6.66432	1.49632	4.24734	9.95285	14.5042	12.316	7.80271	13.3502	5.11223	6.81075		5.40485	11.1496	8.85072
% spore germination 50 Cu
rep1	18.1102	6.66667	18.9655	17.8218	13.3929	11.0345	12.8205	13.5135	10.2941	30	20.354
rep2	26	16.6667	20.9677	9.7561	19.6078	13.5135	23.9669	22.5225	12.5	15.2778	17.2727
rep3	18	25.2427	16.3793	12.3077	7.01754	13.1944	27.2727	14.1667	16.3793	15.0943	20.1923
mean	22	20.9547	18.6735	11.0319	13.3127	13.354	21.3534	16.7342	13.0578	20.124	19.273		18.165	13.3333	18.1085
SD	5.65685	6.06418	3.24451	1.80425	8.90269	0.225616	7.57229	5.02343	3.08071	8.55332	1.73418		5.66111	4.09299	5.77248
Spore germination ratio 50/0 Cu
rep1	0.592699	0.208547	0.632184	0.443649	0.366848	0.228715	0.225713	0.365991	0.187716	0.726316	0.484284
rep2	0.586512	0.378788	0.638785	0.232195	0.371517	0.252252	0.409757	0.431034	0.247727	0.338889	0.345455
rep3	0.498462	0.764494	0.53605	0.362919	0.202172	0.503344	0.75	0.336852	0.548928	0.431698	0.553994
mean	0.559224	0.45061	0.60234	0.346254	0.313512	0.328104	0.461824	0.377959	0.328124	0.498968	0.461244		0.489607	0.320808	0.425624
SD	0.0527126	0.284847	0.0575031	0.106707	0.0964517	0.152218	0.265993	0.0482184	0.193562	0.202284	0.106162		0.169517	0.11425	0.165761
Disease lesions / 100 needles
rep1	17.0732	2.89256	21.2928	12.6844	13.1915	14.5078	17.8261	11.165	10.989	12.0482	7.47664
rep2	38.5366	9.52381	27.0642	22.3077	15.1515	6.5	3.87597	12.3596	41.3793	66.6667	23.7288
rep 3	23.9024	1.0582			14.2857	15.7895	19.4805	14.2857	24.0876	22.5352
rep4	6.8	6.34921	19.7279	14.3541	7.87879	83.3333	20.1613	21.6867	10.7383	23.6111	2.85714
mean	21.578	4.95594	22.695	16.4487	12.6269	30.0326	15.336	14.8743	21.7985	31.2153	11.3542		16.4194	21.3298	18.9157
SD	13.3126	3.75307	3.86394	5.14225	3.26541	35.7707	7.70267	4.72011	14.4663	24.2029	10.9628		10.3926	25.2885	14.5179
Biomass in planta ng DNA / lesion
rep1	1.08377	0.504422	1.08362	0.893126	0.484229	0.801156	0.646001	0.556156	0.448038	0.568414	0.48236
rep2	0.911937	0.505776	1.07921	0.702317	0.418604	0.356865	0.543789	0.501055	0.410736	0.680843	0.486973
rep3	0.925742	0.805102	0.930375	0.809904	0.493035	0.75956	0.371787	0.425383	0.494949	0.687319	0.516518
mean	0.973817	0.6051	1.03107	0.801783	0.465289	0.639194	0.520526	0.494198	0.451241	0.645525	0.495284		0.852942	0.552242	0.521355
SD	0.0954722	0.173208	0.0872316	0.0956631	0.0406703	0.245387	0.138579	0.0656555	0.0421976	0.0668587	0.018534		0.200659	0.183903	0.0946704
Biomass in planta ng DNA / mg DW
rep1	1.76625	0.630528	1.89425	1.52357	0.90793	0.867919	0.825445	0.628425	0.538507	1.08082	0.891608
rep2	1.8052	0.947907	2.28002	1.70035	0.57558	0.981379	0.541084	1.44448	0.42785	0.851054	0.885405
rep3	1.84902	0.585529	1.91173	1.27846	0.887464	0.843956	0.634282	0.637	0.618686	1.37464	0.953572
mean	1.80682	0.721321	2.02867	1.50079	0.790325	0.897751	0.666937	0.903303	0.528348	1.10217	0.910195		1.5144	0.844038	0.822191
SD	0.0414094	0.197514	0.217857	0.211864	0.186256	0.0734081	0.144966	0.468696	0.0958227	0.262444	0.0376938		0.539661	0.139621	0.298786
