# Supplementary material for: Reduced Virulence of an Introduced Forest Pathogen over 50 Years
Source: Microorganisms. 2019 Oct 5;7(10):420. doi: 10.3390/microorganisms7100420 (PMC6843257; doi:10.3390/microorganisms7100420)
Supplement: Supplementary file 1 [file microorganisms-07-00420-s001.zip › Table_S5.xlsx]

## Sheet: TaDs_Austen_oct11_curated_repea
Table S5 Dothistroma septosporum NZE10 curated repeats over 200 bp
chromosome	Type	start bp	end bp	orientiation	family
scaffold_1	LTR retrotransposon	1667	3803	+	Name=fam328-2332_scaff01_1667-3803
scaffold_1	Ty3-gypsy	3805	4446	-	Name=fam471-2334_scaff01_4446-3805
scaffold_1	Ty3-gypsy	4311	4669	-	Name=fam471-2337_scaff01_4311-4669
scaffold_1	Unclassified	672905	673486	-	Name=fam469-2412_scaff01_673486-672905
scaffold_1	Ty3-gypsy	2251403	2251608	-	Name=fam47-123_scaff01_2251608-2251403
scaffold_1	Tc1-mariner	2453287	2453777	+	Name=fam103-129_scaff01_2453287-2453777
scaffold_1	Tc1-mariner	2456292	2456805	+	Name=fam103-2313_scaff16_2456292-2456805
scaffold_1	Tc1-mariner	4595384	4595876	-	Name=fam103-236_scaff01_4595876-4595384
scaffold_1	Unclassified	4674653	4675421	-	Name=fam183-2439_scaff01_4675421-4674653
scaffold_1	solo-LTR	4675473	4675873	-	Name=fam218-2442_scaff01_4675873-4675473
scaffold_1	Ty3-gypsy	4675884	4688329	-	Name=fam471-2337_scaff01_4688329-4675884
scaffold_1	Unclassified	4688453	4692422	+	Name=fam780-2542_scaff01_4688453-4692422
scaffold_1	Unclassified	4692405	4693916	+	Name=fam780-2543_scaff01_4692405-4693916
scaffold_1	solo-LTR	4693918	4694438	-	Name=fam218-2544_scaff01_4694438-4693918
scaffold_1	Unclassified	4694442	4694656	+	Name=fam183-2520_scaff01_4694442-4694656
scaffold_1	Unclassified	4695180	4695721	+	Name=fam647-2545_scaff01_4695180-4695721
scaffold_1	Unclassified	4696485	4697261	-	Name=fam183-2520_scaff01_4697261-4696485
scaffold_1	Helitron-like	4697414	4709701	+	Name=fam176-2556_scaff04_4697414-4709701
scaffold_1	Helitron-like	4707703	4711752	+	Name=fam176-2555_scaff03_4707703-4711752
scaffold_1	Helitron-like	4711436	4712022	+	Name=fam176-2556_scaff04_4711436-4712022
scaffold_1	LTR retrotransposon	4711941	4712363	+	Name=fam328-2332_scaff01_4711941-4712363
scaffold_1	LTR retrotransposon	4712006	4712363	+	Name=fam328-2338_scaff01_4712006-4712363
scaffold_1	Helitron-like	4712363	4719052	+	Name=fam176-255_scaff01_4712363-4719052
scaffold_1	Helitron-like	4718786	4719110	+	Name=fam176-547_scaff03_4718786-4719110
scaffold_1	Unclassified	4720643	4720948	+	Name=fam647-2545_scaff01_4720643-4720948
scaffold_1	Ty1-copia	4722465	4723138	+	Name=fam181-2531_scaff01_4722465-4723138
scaffold_1	Ty1-copia	4722996	4723274	+	Name=fam181-1703_scaff09_4722996-4723274
scaffold_1	Ty1-copia	4723147	4723714	+	Name=fam181-262_scaff01_4723147-4723714
scaffold_1	Unclassified	4723716	4724517	+	Name=fam183-2447_scaff01_4723716-4724517
scaffold_1	Unclassified	4723719	4724435	+	Name=fam183-2520_scaff01_4723719-4724435
scaffold_1	Ty1-copia	4724518	4724845	+	Name=fam181-264_scaff01_4724518-4724845
scaffold_1	solo-LTR	4724970	4725491	-	Name=fam218-2571_scaff01_4725491-4724970
scaffold_1	Unclassified	4725269	4725892	+	Name=fam647-2101_scaff12_4725269-4725892
scaffold_1	Unclassified	4725494	4726164	+	Name=fam183-2519_scaff13_4725494-4726164
scaffold_1	Unclassified	4726186	4726395	-	Name=fam647-2534_scaff01_4726395-4726186
scaffold_1	Ty1-copia	4726394	4726959	-	Name=fam181-269_scaff01_4726959-4726394
scaffold_1	Unclassified	4726960	4727974	+	Name=fam744-2378_scaff01_4726960-4727974
scaffold_1	Ty1-copia	4729166	4729432	-	Name=fam181-2540_scaff03_4729166-4729432
scaffold_1	Unclassified	4731648	4731901	+	Name=fam183-2495_scaff09_4731648-4731901
scaffold_1	Unclassified	4731871	4732112	-	Name=fam183-274_scaff01_4732112-4731871
scaffold_1	Unclassified	4732137	4732616	-	Name=fam183-274_scaff01_4732616-4732137
scaffold_1	Unclassified	4732620	4733059	-	Name=fam647-2101_scaff12_4732620-4733059
scaffold_1	solo-LTR	4732837	4733358	+	Name=fam218-2445_scaff01_4732837-4733358
scaffold_1	Unclassified	4733403	4734188	+	Name=fam183-2447_scaff01_4733403-4734188
scaffold_1	Tc1-mariner	5098441	5101979	+	Name=fam103-299_scaff01_5098441-5101979
scaffold_10	Unclassified	81070	81367	-	Name=fam469-1362_scaff07_81070-81367
scaffold_10	Unclassified	81070	81305	-	Name=fam469-1786_scaff10_81305-81070
scaffold_10	Unclassified	81193	81541	-	Name=fam469-2413_scaff05_81193-81541
scaffold_10	Unclassified	81309	81541	-	Name=fam469-1787_scaff10_81541-81309
scaffold_10	MITE	200681	200999	+	Name=fam414-1796_scaff10_200681-200999
scaffold_10	solo-LTR	255020	255539	+	Name=fam218-2496_scaff10_255020-255539
scaffold_10	Ty1-copia	255543	261770	+	Name=fam181-2497_scaff10_255543-261770
scaffold_10	solo-LTR	261775	262294	+	Name=fam218-2498_scaff10_261775-262294
scaffold_10	Ty3-gypsy	263025	266791	-	Name=fam506-2598_scaff10_266791-263025
scaffold_10	Unclassified	266794	267805	+	Name=fam744-2395_scaff10_266794-267805
scaffold_10	Ty3-gypsy	267811	269773	-	Name=fam506-1807_scaff10_269773-267811
scaffold_10	LTR retrotransposon	269772	283070	-	Name=fam328-1808_scaff10_283070-269772
scaffold_10	LTR retrotransposon	282714	283118	-	Name=fam328-2332_scaff01_282714-283118
scaffold_10	Ty3-gypsy	283168	283384	+	Name=fam506-2599_scaff10_283168-283384
scaffold_10	Ty1-copia	283384	283589	-	Name=fam181-2497_scaff10_283384-283589
scaffold_10	Ty1-copia	283574	284204	-	Name=fam181-2459_scaff04_283574-284204
scaffold_10	Ty1-copia	283580	284136	-	Name=fam181-1812_scaff10_284136-283580
scaffold_10	Unclassified	284205	284418	-	Name=fam647-2545_scaff01_284205-284418
scaffold_10	Ty3-gypsy	284670	286915	-	Name=fam506-2712_scaff10_286915-284670
scaffold_10	solo-LTR	286946	287470	+	Name=fam218-1816_scaff10_286946-287470
scaffold_10	Ty3-gypsy	287471	288454	-	Name=fam506-1807_scaff10_287471-288454
scaffold_10	Unclassified	288446	289001	-	Name=fam214-1818_scaff10_289001-288446
scaffold_10	Ty3-gypsy	291001	297357	-	Name=fam506-2622_scaff10_297357-291001
scaffold_10	Ty3-gypsy	297358	297573	-	Name=fam506-2623_scaff10_297573-297358
scaffold_10	Ty3-gypsy	297360	297602	-	Name=fam506-2626_scaff10_297360-297602
scaffold_10	Ty3-gypsy	297361	297770	-	Name=fam506-2625_scaff10_297361-297770
scaffold_10	solo-LTR	297667	298190	-	Name=fam218-2500_scaff10_298190-297667
scaffold_10	Unclassified	297969	298234	+	Name=fam647-2101_scaff12_297969-298234
scaffold_10	Ty3-gypsy	299669	300909	+	Name=fam506-2625_scaff10_299669-300909
scaffold_10	Ty3-gypsy	299802	300329	+	Name=fam506-1825_scaff10_299802-300329
scaffold_10	Ty3-gypsy	299802	301060	+	Name=fam506-2613_scaff11_299802-301060
scaffold_10	Ty3-gypsy	300506	302067	+	Name=fam506-2598_scaff10_300506-302067
scaffold_10	Ty3-gypsy	301426	302102	+	Name=fam506-2617_scaff03_301426-302102
scaffold_10	Ty3-gypsy	301426	302254	+	Name=fam506-2626_scaff10_301426-302254
scaffold_10	Ty3-gypsy	301503	302102	+	Name=fam506-2591_scaff03_301503-302102
scaffold_10	Ty3-gypsy	301645	301942	+	Name=fam506-1826_scaff10_301645-301942
scaffold_10	solo-LTR	303802	304325	+	Name=fam218-2501_scaff10_303802-304325
scaffold_10	Tc1-mariner	520221	522810	-	Name=fam103-1852_scaff10_522810-520221
scaffold_10	Ty3-gypsy	522664	523022	+	Name=fam506-2567_scaff03_522664-523022
scaffold_10	Ty3-gypsy	522809	523023	+	Name=fam506-2624_scaff10_522809-523023
scaffold_10	Ty3-gypsy	523026	529381	+	Name=fam506-2625_scaff10_523026-529381
scaffold_10	Tc1-mariner	529382	530339	-	Name=fam103-1854_scaff10_530339-529382
scaffold_10	Unclassified	824360	824879	-	Name=fam653-1877_scaff10_824879-824360
scaffold_10	Ty3-gypsy	1397559	1403913	-	Name=fam506-2626_scaff10_1403913-1397559
scaffold_10	Ty3-gypsy	1403916	1404130	-	Name=fam506-2627_scaff10_1404130-1403916
scaffold_11	Unclassified	2395	2735	+	Name=fam214-1818_scaff10_2395-2735
scaffold_11	Unclassified	2397	2641	+	Name=fam214-2578_scaff11_2397-2641
scaffold_11	Unclassified	2398	2680	+	Name=fam214-2580_scaff13_3298-2680
scaffold_11	Tc1-mariner	176423	179799	-	Name=fam103-2433_scaff11_179799-176261
scaffold_11	Unclassified	345301	345850	-	Name=fam653-1944_scaff11_345850-345301
scaffold_11	Unclassified	423595	423822	+	Name=fam336-2634_scaff11_423595-423822
scaffold_11	Unclassified	425604	425982	-	Name=fam336-2637_scaff11_425982-425604
scaffold_11	Ty3-gypsy	426078	426293	-	Name=fam506-2587_scaff11_426293-426078
scaffold_11	solo-LTR	427012	427535	+	Name=fam218-2503_scaff11_427012-427535
scaffold_11	LTR retrotransposon	428802	429156	-	Name=fam328-2359_scaff11_429156-428802
scaffold_11	Unclassified	429569	429909	+	Name=fam214-1968_scaff11_429569-429909
scaffold_11	solo-LTR	429911	430419	+	Name=fam218-2505_scaff11_429911-430419
scaffold_11	LTR retrotransposon	430422	432173	+	Name=fam328-1970_scaff11_430422-432173
scaffold_11	LTR retrotransposon	432169	434412	-	Name=fam328-2377_scaff11_434412-432169
scaffold_11	solo-LTR	434408	434927	+	Name=fam218-2507_scaff11_434408-434927
scaffold_11	Unclassified	434929	435503	+	Name=fam780-1973_scaff11_434929-435503
scaffold_11	Helitron-like	435505	437089	+	Name=fam176-1974_scaff11_435505-437089
scaffold_11	Helitron-like	440463	455275	+	Name=fam176-1975_scaff11_440463-455275
scaffold_11	Helitron-like	455276	463128	-	Name=fam176-2566_scaff11_463128-455276
scaffold_11	Helitron-like	461129	477088	-	Name=fam176-2566_scaff11_477088-461129
scaffold_11	Helitron-like	477562	479204	-	Name=fam176-1977_scaff11_479204-477562
scaffold_11	Helitron-like	479205	486273	+	Name=fam176-2570_scaff11_479205-486273
scaffold_11	Unclassified	486272	489828	+	Name=fam780-2509_scaff11_486272-489828
scaffold_11	solo-LTR	489829	490352	-	Name=fam218-2510_scaff11_490352-489829
scaffold_11	LTR retrotransposon	490365	490731	+	Name=fam328-2360_scaff11_490365-490731
scaffold_11	Unclassified	490915	491322	-	Name=fam183-1982_scaff11_491322-490915
scaffold_11	Ty3-gypsy	998206	998422	+	Name=fam506-2612_scaff11_998206-998422
scaffold_11	Ty3-gypsy	998424	1004401	+	Name=fam506-2613_scaff11_998424-1004401
scaffold_11	Unclassified	1004403	1005416	+	Name=fam744-2396_scaff11_1004403-1005416
scaffold_11	Ty3-gypsy	1005417	1005795	+	Name=fam506-2018_scaff11_1005417-1005795
scaffold_11	Unclassified	1434422	1435003	+	Name=fam469-2414_scaff11_1434422-1435003
scaffold_12	Unclassified	502258	502552	+	Name=fam214-1115_scaff05_502258-502552
scaffold_12	Unclassified	502261	502517	+	Name=fam214-2580_scaff13_502261-502517
scaffold_12	solo-LTR	502505	502835	-	Name=fam218-2373_scaff12_502835-502505
scaffold_12	Unclassified	502837	503360	-	Name=fam647-2375_scaff12_503360-502837
scaffold_12	Unclassified	503362	504522	-	Name=fam780-2376_scaff12_504522-503362
scaffold_12	Ty3-gypsy	504521	510868	-	Name=fam506-2614_scaff12_510868-504521
scaffold_12	Ty3-gypsy	510872	511084	-	Name=fam506-2615_scaff12_511084-510872
scaffold_12	Unclassified	511087	512765	-	Name=fam780-2099_scaff12_512765-511087
scaffold_12	Unclassified	511087	513315	-	Name=fam780-2515_scaff13_511087-513315
scaffold_12	Unclassified	512759	515009	-	Name=fam780-2511_scaff12_515339-515009
scaffold_12	Unclassified	513010	515339	-	Name=fam780-2511_scaff12_515339-512759
scaffold_12	solo-LTR	515341	515861	+	Name=fam218-2512_scaff12_515341-515861
scaffold_12	solo-LTR	515568	516057	-	Name=fam218-2513_scaff13_515568-516057
scaffold_12	solo-LTR	515802	516057	-	Name=fam218-2503_scaff11_515802-516057
scaffold_12	Unclassified	515834	516759	+	Name=fam647-2101_scaff12_515834-516759
scaffold_12	Unclassified	516706	516944	+	Name=fam336-2637_scaff11_516706-516944
scaffold_12	Unclassified	699452	700469	+	Name=fam744-2397_scaff12_699452-700469
scaffold_12	Helitron-like	978175	1001688	-	Name=fam176-2399_scaff12_1001688-978175
scaffold_12	Ty3-gypsy	1045828	1058273	+	Name=fam471-2363_scaff12_1045828-1058273
scaffold_12	Ty3-gypsy	1058624	1071030	+	Name=fam471-2169_scaff12_1058624-1071030
scaffold_12	Unclassified	1079274	1080285	+	Name=fam744-2400_scaff12_1079274-1080285
scaffold_13	Unclassified	324251	324834	-	Name=fam469-2207_scaff13_324834-324251
scaffold_13	Tc1-mariner	455999	457548	-	Name=fam103-2437_scaff13_455999-457548
scaffold_13	Tc1-mariner	457586	458002	-	Name=fam103-2437_scaff13_458002-457586
scaffold_13	Ty3-gypsy	458002	458218	-	Name=fam506-2607_scaff13_458218-458002
scaffold_13	Ty3-gypsy	458005	458303	-	Name=fam506-2567_scaff03_458005-458303
scaffold_13	Unclassified	459647	459877	-	Name=fam653-2220_scaff13_459877-459647
scaffold_13	Unclassified	465989	466525	+	Name=fam653-2221_scaff13_465989-466525
scaffold_13	Unclassified	487304	487534	-	Name=fam183-2495_scaff09_487304-487534
scaffold_13	solo-LTR	487873	488393	+	Name=fam218-2513_scaff13_487873-488393
scaffold_13	LTR retrotransposon	489101	489516	+	Name=fam328-2364_scaff13_489101-489516
scaffold_13	LTR retrotransposon	489157	501205	+	Name=fam328-2408_scaff13_489157-501205
scaffold_13	LTR retrotransposon	503568	504462	+	Name=fam328-2227_scaff13_503568-504462
scaffold_13	LTR retrotransposon	504251	504966	+	Name=fam328-2364_scaff13_504251-504966
scaffold_13	LTR retrotransposon	504610	505009	+	Name=fam328-874_scaff04_504610-505009
scaffold_13	solo-LTR	506410	506931	+	Name=fam218-2514_scaff13_506410-506931
scaffold_13	Unclassified	506934	510488	-	Name=fam780-2515_scaff13_510488-506934
scaffold_13	Unclassified	508569	512532	-	Name=fam780-2516_scaff13_512532-508569
scaffold_13	solo-LTR	512532	513054	+	Name=fam218-2517_scaff13_512532-513054
scaffold_13	Unclassified	513110	513887	+	Name=fam183-2519_scaff13_513110-513887
scaffold_13	Unclassified	514228	514517	+	Name=fam214-2580_scaff13_514228-514517
scaffold_13	Ty3-gypsy	571357	571557	-	Name=fam47-2242_scaff13_571557-571357
scaffold_13	MITE	653442	653761	+	Name=fam414-2253_scaff13_653442-653761
scaffold_13	Unclassified	961553	962462	+	Name=fam317-2273_scaff13_961553-962566
scaffold_14	Tc1-mariner	786	4324	+	Name=fam103-2434_scaff14_786-4324
scaffold_14	Tc1-mariner	147119	150657	+	Name=fam103-2284_scaff14_147119-150657
scaffold_14	Unclassified	406996	407235	+	Name=fam214-2309_scaff14_406996-407235
scaffold_2	LTR retrotransposon	166785	167130	-	Name=fam328-2352_scaff07_166785-167130
scaffold_2	LTR retrotransposon	166902	167125	-	Name=fam328-2339_scaff02_167125-166902
scaffold_2	Unclassified	166956	167660	+	Name=fam647-2101_scaff12_166956-167660
scaffold_2	Unclassified	167106	167650	+	Name=fam183-2448_scaff02_167106-167650
scaffold_2	Unclassified	167466	167896	-	Name=fam214-1243_scaff06_167466-167896
scaffold_2	Unclassified	167603	167897	-	Name=fam214-1818_scaff10_167603-167897
scaffold_2	Unclassified	167649	167894	-	Name=fam214-2574_scaff02_167894-167649
scaffold_2	Ty3-gypsy	172623	172838	-	Name=fam506-2588_scaff02_172838-172623
scaffold_2	Ty3-gypsy	172625	172883	-	Name=fam506-2614_scaff12_172625-172883
scaffold_2	Ty3-gypsy	173613	173839	+	Name=fam506-2018_scaff11_173613-173839
scaffold_2	Unclassified	175410	176207	+	Name=fam214-320_scaff02_175410-176207
scaffold_2	solo-LTR	176208	176731	+	Name=fam218-2449_scaff02_176208-176731
scaffold_2	Unclassified	179559	179805	-	Name=fam336-2630_scaff02_179805-179559
scaffold_2	solo-LTR	181119	181641	-	Name=fam218-2451_scaff02_181641-181119
scaffold_2	Ty1-copia	181644	187849	-	Name=fam181-2452_scaff02_187849-181644
scaffold_2	solo-LTR	188309	188831	+	Name=fam218-327_scaff02_188309-188831
scaffold_2	solo-LTR	189348	189870	+	Name=fam218-2453_scaff02_189348-189870
scaffold_2	Unclassified	190274	190635	+	Name=fam336-2641_scaff02_190274-190635
scaffold_2	Tc1-mariner	191520	191875	+	Name=fam103-1852_scaff10_191520-191875
scaffold_2	Tc1-mariner	191590	191837	+	Name=fam103-333_scaff02_191590-191837
scaffold_2	Tc1-mariner	191811	192358	+	Name=fam103-2437_scaff13_191811-192358
scaffold_2	Tc1-mariner	192035	192358	+	Name=fam103-2436_scaff09_192035-192358
scaffold_2	Helitron-like	614280	637769	-	Name=fam176-360_scaff02_637769-614280
scaffold_2	Ty3-gypsy	2617891	2618091	-	Name=fam47-454_scaff02_2618091-2617891
scaffold_2	Unclassified	3291577	3293041	+	Name=fam317-488_scaff02_3291577-3293149
scaffold_2	Unclassified	3306673	3306877	+	Name=fam317-1489_scaff07_3306673-3306877
scaffold_3	Helitron-like	124350	147898	+	Name=fam176-2370_scaff03_124350-147898
scaffold_3	LTR retrotransposon	147903	149378	+	Name=fam328-506_scaff03_147903-149378
scaffold_3	Unclassified	149380	150375	-	Name=fam744-2380_scaff03_150375-149380
scaffold_3	LTR retrotransposon	150356	154932	+	Name=fam328-2340_scaff03_150356-154932
scaffold_3	LTR retrotransposon	154576	155034	+	Name=fam328-874_scaff04_154576-155034
scaffold_3	Helitron-like	154841	155168	-	Name=fam176-2370_scaff03_154841-155168
scaffold_3	Ty3-gypsy	155879	156626	-	Name=fam506-2402_scaff03_156626-155879
scaffold_3	Unclassified	157174	158172	-	Name=fam744-2381_scaff03_158172-157174
scaffold_3	Ty3-gypsy	158220	158888	-	Name=fam506-2591_scaff03_158220-158888
scaffold_3	Ty3-gypsy	158496	158882	-	Name=fam506-2611_scaff03_158882-158496
scaffold_3	LTR retrotransposon	160787	161000	-	Name=fam328-2340_scaff03_160787-161000
scaffold_3	Ty3-gypsy	190516	191393	+	Name=fam506-2567_scaff03_190516-191393
scaffold_3	Ty3-gypsy	193520	193736	+	Name=fam506-2590_scaff03_193520-193736
scaffold_3	Unclassified	197250	197620	+	Name=fam336-2641_scaff02_197250-197620
scaffold_3	Unclassified	197250	197477	+	Name=fam336-526_scaff03_197250-197477
scaffold_3	Ty3-gypsy	197625	202241	+	Name=fam506-2591_scaff03_197625-202241
scaffold_3	Tc1-mariner	233332	233570	+	Name=fam103-531_scaff03_233332-233570
scaffold_3	Tc1-mariner	233333	233625	+	Name=fam103-299_scaff01_233333-233625
scaffold_3	Ty3-gypsy	233568	233783	+	Name=fam506-2616_scaff03_233568-233783
scaffold_3	Ty3-gypsy	233785	240141	+	Name=fam506-2617_scaff03_233785-240141
scaffold_3	Tc1-mariner	240140	243448	+	Name=fam103-533_scaff03_240140-243448
scaffold_3	LTR retrotransposon	321873	322929	+	Name=fam328-540_scaff03_321873-322929
scaffold_3	LTR retrotransposon	322930	327680	+	Name=fam328-2341_scaff03_322930-327680
scaffold_3	Helitron-like	327686	345776	+	Name=fam176-2552_scaff03_327686-345776
scaffold_3	Helitron-like	343777	351182	+	Name=fam176-2552_scaff03_343777-351182
scaffold_3	LTR retrotransposon	351183	355606	+	Name=fam328-2367_scaff03_351183-355606
scaffold_3	solo-LTR	355610	356130	+	Name=fam218-544_scaff03_355610-356130
scaffold_3	Helitron-like	356130	362111	+	Name=fam176-545_scaff03_356130-362111
scaffold_3	Ty1-copia	363235	363457	+	Name=fam181-1699_scaff09_363235-363457
scaffold_3	Helitron-like	363458	365665	+	Name=fam176-547_scaff03_363458-365665
scaffold_3	Helitron-like	364458	365862	+	Name=fam176-1269_scaff06_364458-365862
scaffold_3	Ty3-gypsy	365867	368287	-	Name=fam506-2618_scaff03_368287-365867
scaffold_3	Ty3-gypsy	368287	368503	-	Name=fam506-2619_scaff03_368503-368287
scaffold_3	Ty1-copia	368506	371378	-	Name=fam181-2540_scaff03_371378-368506
scaffold_3	Unclassified	371183	371429	+	Name=fam780-2509_scaff11_371183-371429
scaffold_3	Helitron-like	682117	689552	+	Name=fam176-2555_scaff03_682117-689552
scaffold_3	Helitron-like	687553	705629	+	Name=fam176-2555_scaff03_687553-705629
scaffold_3	Helitron-like	1064404	1064779	-	Name=fam176-582_scaff03_1064779-1064404
scaffold_3	Helitron-like	1065410	1065649	-	Name=fam176-583_scaff03_1065649-1065410
scaffold_3	Helitron-like	1090354	1090671	-	Name=fam176-584_scaff03_1090671-1090354
scaffold_3	Ty3-gypsy	1423593	1423798	-	Name=fam47-123_scaff01_1423593-1423798
scaffold_3	MITE	2577790	2578110	+	Name=fam414-709_scaff03_2577790-2578110
scaffold_4	MITE	66846	67165	+	Name=fam414-723_scaff04_66846-67165
scaffold_4	Unclassified	1207441	1207983	+	Name=fam469-797_scaff04_1207441-1207983
scaffold_4	Ty3-gypsy	1253254	1253612	+	Name=fam471-2406_scaff07_1253254-1253612
scaffold_4	Ty3-gypsy	1253494	1263757	+	Name=fam471-800_scaff04_1253494-1263757
scaffold_4	Ty3-gypsy	1263934	1265861	+	Name=fam471-2337_scaff01_1263934-1265861
scaffold_4	Ty3-gypsy	1263943	1265469	+	Name=fam471-2366_scaff04_1263943-1265469
scaffold_4	Ty3-gypsy	1265833	1266042	+	Name=fam471-2169_scaff12_1265833-1266042
scaffold_4	Ty3-gypsy	1265890	1266094	+	Name=fam471-803_scaff04_1265890-1266094
scaffold_4	Ty3-gypsy	1265926	1266211	+	Name=fam471-800_scaff04_1265926-1266211
scaffold_4	Ty3-gypsy	1595341	1595542	+	Name=fam47-454_scaff02_1595341-1595542
scaffold_4	Unclassified	2172981	2173716	+	Name=fam183-2536_scaff04_2172981-2173716
scaffold_4	Helitron-like	2173799	2197290	+	Name=fam176-2556_scaff04_2173799-2197290
scaffold_4	Ty1-copia	2198517	2199631	+	Name=fam181-2482_scaff07_2198517-2199631
scaffold_4	Ty1-copia	2198677	2199631	+	Name=fam181-2532_scaff04_2198677-2199631
scaffold_4	Unclassified	2199864	2200107	-	Name=fam336-2631_scaff04_2200107-2199864
scaffold_4	Ty3-gypsy	2200409	2201259	+	Name=fam506-2620_scaff07_2200409-2201259
scaffold_4	Ty3-gypsy	2200415	2200943	+	Name=fam506-872_scaff04_2200415-2200943
scaffold_4	LTR retrotransposon	2201257	2201660	+	Name=fam328-2342_scaff04_2201257-2201660
scaffold_4	LTR retrotransposon	2201301	2208429	+	Name=fam328-874_scaff04_2201301-2208429
scaffold_4	solo-LTR	2208417	2208939	-	Name=fam218-2458_scaff04_2208939-2208417
scaffold_4	Ty1-copia	2208943	2213523	-	Name=fam181-2459_scaff04_2213523-2208943
scaffold_4	Ty1-copia	2213527	2214497	-	Name=fam181-2460_scaff04_2214497-2213527
scaffold_4	solo-LTR	2214499	2215020	-	Name=fam218-2461_scaff04_2215020-2214499
scaffold_4	LTR retrotransposon	2215020	2221252	+	Name=fam328-877_scaff04_2215020-2221252
scaffold_4	Ty3-gypsy	2221251	2222417	-	Name=fam506-2712_scaff10_2221251-2222417
scaffold_4	Ty3-gypsy	2221288	2223284	-	Name=fam506-2625_scaff10_2221288-2223284
scaffold_4	LTR retrotransposon	2223283	2236548	-	Name=fam328-2342_scaff04_2236548-2223283
scaffold_4	LTR retrotransposon	2236195	2236673	-	Name=fam328-2342_scaff04_2236195-2236673
scaffold_4	LTR retrotransposon	2236195	2236839	-	Name=fam328-2355_scaff08_2236195-2236839
scaffold_4	Unclassified	2236509	2236877	+	Name=fam183-1697_scaff09_2236509-2236877
scaffold_4	Unclassified	2236562	2236879	+	Name=fam183-2537_scaff04_2236562-2236879
scaffold_4	Unclassified	2236968	2237218	+	Name=fam183-2447_scaff01_2236968-2237218
scaffold_4	Unclassified	2568778	2569207	+	Name=fam317-899_scaff04_2568778-2569207
scaffold_4	Unclassified	2605846	2606094	-	Name=fam317-2688_scaff04_2605846-2606094
scaffold_4	Unclassified	2605873	2606345	-	Name=fam317-2688_scaff04_2606345-2605873
scaffold_4	Unclassified	2619799	2620580	-	Name=fam317-903_scaff04_2620580-2619799
scaffold_5	Unclassified	97722	98296	-	Name=fam469-920_scaff05_98296-97722
scaffold_5	Tc1-mariner	248760	252025	+	Name=fam103-930_scaff05_248760-252025
scaffold_5	Helitron-like	252028	275540	+	Name=fam176-2382_scaff05_252028-275540
scaffold_5	Tc1-mariner	275541	275812	+	Name=fam103-932_scaff05_275541-275812
scaffold_5	Tc1-mariner	1408601	1412139	+	Name=fam103-1020_scaff05_1408601-1412139
scaffold_5	Unclassified	2116931	2117509	+	Name=fam469-2413_scaff05_2116931-2117509
scaffold_5	Unclassified	2305607	2305837	-	Name=fam336-2631_scaff04_2305607-2305837
scaffold_5	Unclassified	2305669	2306381	-	Name=fam214-1115_scaff05_2305669-2306381
scaffold_5	Unclassified	2306121	2306381	-	Name=fam214-320_scaff02_2306121-2306381
scaffold_5	Unclassified	2306151	2306365	-	Name=fam214-2580_scaff13_2306151-2306365
scaffold_5	Unclassified	2306152	2306400	-	Name=fam214-2574_scaff02_2306152-2306400
scaffold_5	solo-LTR	2306336	2306858	-	Name=fam218-2462_scaff05_2306858-2306336
scaffold_5	Unclassified	2306860	2307179	+	Name=fam183-1097_scaff05_2306860-2307179
scaffold_5	solo-LTR	2307184	2307706	+	Name=fam218-2463_scaff05_2307184-2307706
scaffold_5	Helitron-like	2308395	2327794	+	Name=fam176-2383_scaff05_2308395-2327794
scaffold_5	Unclassified	2327798	2328252	+	Name=fam744-2384_scaff05_2327798-2328252
scaffold_5	Unclassified	2328470	2329482	+	Name=fam744-2385_scaff05_2328470-2329482
scaffold_5	Helitron-like	2329482	2333558	+	Name=fam176-2568_scaff05_2329482-2333558
scaffold_5	Unclassified	2334405	2334944	-	Name=fam647-2545_scaff01_2334405-2334944
scaffold_5	Unclassified	2342848	2343372	+	Name=fam647-2467_scaff05_2342848-2343372
scaffold_5	Unclassified	2344341	2345574	+	Name=fam214-1115_scaff05_2344341-2345574
scaffold_6	Unclassified	121	391	-	Name=fam317-2273_scaff13_121-391
scaffold_6	MITE	609439	609704	-	Name=fam414-1184_scaff06_609704-609439
scaffold_6	Tc1-mariner	609708	613246	-	Name=fam103-1185_scaff06_613246-609708
scaffold_6	solo-LTR	1298861	1299384	+	Name=fam218-2468_scaff06_1298861-1299384
scaffold_6	Ty1-copia	1299386	1302489	+	Name=fam181-2469_scaff06_1299386-1302489
scaffold_6	solo-LTR	1302489	1303014	-	Name=fam218-1235_scaff06_1303014-1302489
scaffold_6	Ty1-copia	1303022	1306103	+	Name=fam181-2470_scaff06_1303022-1306103
scaffold_6	Ty1-copia	1306104	1306633	+	Name=fam181-2471_scaff06_1306104-1306633
scaffold_6	Ty3-gypsy	1306628	1307528	+	Name=fam506-2617_scaff03_1306628-1307528
scaffold_6	Ty3-gypsy	1306633	1307436	+	Name=fam506-2711_scaff06_1306633-1307436
scaffold_6	LTR retrotransposon	1307524	1320017	+	Name=fam328-2344_scaff06_1307524-1320017
scaffold_6	LTR retrotransposon	1321282	1321967	+	Name=fam328-1239_scaff06_1321282-1321967
scaffold_6	Unclassified	1323167	1324397	-	Name=fam214-1243_scaff06_1324397-1323167
scaffold_6	Tc1-mariner	1377935	1378773	+	Name=fam103-1854_scaff10_1377935-1378773
scaffold_6	Tc1-mariner	1377935	1378681	+	Name=fam103-930_scaff05_1377935-1378681
scaffold_6	Tc1-mariner	1377965	1378226	+	Name=fam103-1249_scaff06_1377965-1378226
scaffold_6	Unclassified	1378793	1379807	-	Name=fam744-2386_scaff06_1379807-1378793
scaffold_6	Tc1-mariner	1379807	1380305	+	Name=fam103-1251_scaff06_1379807-1380305
scaffold_6	Ty3-gypsy	1380055	1380457	-	Name=fam471-2334_scaff01_1380055-1380457
scaffold_6	Ty3-gypsy	1380321	1382408	-	Name=fam471-2345_scaff06_1382408-1380321
scaffold_6	Ty3-gypsy	1380409	1392771	-	Name=fam471-2345_scaff06_1392771-1380409
scaffold_6	Ty3-gypsy	1396414	1396753	+	Name=fam506-1255_scaff06_1396414-1396753
scaffold_6	Ty3-gypsy	1396414	1396962	+	Name=fam506-1807_scaff10_1396414-1396962
scaffold_6	Ty3-gypsy	1397871	1398300	+	Name=fam506-2591_scaff03_1397871-1398300
scaffold_6	Tc1-mariner	1399025	1400822	+	Name=fam103-2435_scaff06_1399025-1400822
scaffold_6	Tc1-mariner	1400612	1401036	+	Name=fam103-1712_scaff09_1400612-1401036
scaffold_6	Unclassified	1562439	1562640	+	Name=fam653-1267_scaff06_1562439-1562640
scaffold_6	Tc1-mariner	1562797	1564815	-	Name=fam103-1268_scaff06_1564815-1562635
scaffold_6	Helitron-like	1564817	1566169	-	Name=fam176-1269_scaff06_1566169-1564817
scaffold_6	Helitron-like	1566170	1589631	+	Name=fam176-2557_scaff06_1566170-1589631
scaffold_6	Helitron-like	1589632	1590452	-	Name=fam176-1271_scaff06_1590452-1589632
scaffold_6	Helitron-like	1590453	1598473	-	Name=fam176-2569_scaff06_1598473-1590453
scaffold_6	Unclassified	1598473	1599485	-	Name=fam744-2388_scaff06_1599485-1598473
scaffold_6	Helitron-like	1599489	1612476	-	Name=fam176-2558_scaff06_1612476-1599489
scaffold_6	Helitron-like	1610477	1614983	-	Name=fam176-2558_scaff06_1614983-1610477
scaffold_6	Helitron-like	1614948	1620496	-	Name=fam176-1275_scaff06_1620496-1614948
scaffold_6	Unclassified	1620499	1621519	+	Name=fam744-2389_scaff06_1620499-1621519
scaffold_6	Helitron-like	1621521	1628951	-	Name=fam176-2560_scaff06_1628951-1621521
scaffold_6	Tc1-mariner	1628956	1630317	-	Name=fam103-1278_scaff06_1630317-1628956
scaffold_6	Unclassified	1630315	1630637	+	Name=fam653-1279_scaff06_1630315-1630637
scaffold_6	Unclassified	1866304	1866870	+	Name=fam469-1295_scaff06_1866304-1866870
scaffold_7	Unclassified	407	812	-	Name=fam317-1315_scaff07_812-407
scaffold_7	Unclassified	620423	620952	-	Name=fam653-1358_scaff07_620952-620423
scaffold_7	Unclassified	711107	711404	-	Name=fam469-1362_scaff07_711404-711107
scaffold_7	Unclassified	711108	711475	-	Name=fam469-1295_scaff06_711108-711475
scaffold_7	Ty3-gypsy	711335	711606	-	Name=fam471-800_scaff04_711335-711606
scaffold_7	Ty3-gypsy	711484	723983	-	Name=fam471-2406_scaff07_723983-711484
scaffold_7	Tc1-mariner	916173	919711	+	Name=fam103-2431_scaff07_916173-919711
scaffold_7	Unclassified	1350234	1350765	-	Name=fam653-1417_scaff07_1350765-1350234
scaffold_7	Ty3-gypsy	1581288	1581504	+	Name=fam506-2593_scaff07_1581288-1581504
scaffold_7	Unclassified	1591714	1592527	-	Name=fam183-2473_scaff07_1592527-1591714
scaffold_7	Ty1-copia	1592521	1593154	+	Name=fam181-2452_scaff02_1592521-1593154
scaffold_7	solo-LTR	1593155	1593675	+	Name=fam218-2475_scaff07_1593155-1593675
scaffold_7	Ty1-copia	1593676	1593903	+	Name=fam181-2459_scaff04_1593676-1593903
scaffold_7	solo-LTR	1594088	1594610	+	Name=fam218-2476_scaff07_1594088-1594610
scaffold_7	Helitron-like	1594589	1595327	+	Name=fam176-1437_scaff07_1594589-1595327
scaffold_7	solo-LTR	1595318	1595843	-	Name=fam218-2478_scaff07_1595843-1595318
scaffold_7	Helitron-like	1595823	1599280	+	Name=fam176-1439_scaff07_1595823-1599280
scaffold_7	solo-LTR	1599456	1599977	+	Name=fam218-2480_scaff07_1599456-1599977
scaffold_7	LTR retrotransposon	1599978	1607266	+	Name=fam328-1442_scaff07_1599978-1607266
scaffold_7	LTR retrotransposon	1607266	1607792	-	Name=fam328-2348_scaff07_1607792-1607266
scaffold_7	Unclassified	1607796	1608811	+	Name=fam744-2349_scaff07_1607796-1608811
scaffold_7	LTR retrotransposon	1608808	1609022	-	Name=fam328-2350_scaff07_1609222-1608814
scaffold_7	LTR retrotransposon	1608808	1609064	-	Name=fam328-877_scaff04_1608808-1609064
scaffold_7	LTR retrotransposon	1608834	1617155	-	Name=fam328-2351_scaff07_1617155-1608834
scaffold_7	LTR retrotransposon	1617134	1618433	-	Name=fam328-2352_scaff07_1618433-1617134
scaffold_7	LTR retrotransposon	1618433	1620526	+	Name=fam328-1447_scaff07_1618433-1620526
scaffold_7	Unclassified	1620525	1620769	-	Name=fam214-2581_scaff07_1620769-1620525
scaffold_7	Ty3-gypsy	1622909	1623732	-	Name=fam506-1451_scaff07_1623732-1622909
scaffold_7	Helitron-like	1623734	1647242	-	Name=fam176-2562_scaff07_1647242-1623734
scaffold_7	Ty3-gypsy	1647247	1651114	-	Name=fam506-2620_scaff07_1651114-1647247
scaffold_7	Ty3-gypsy	1649115	1652772	-	Name=fam506-2620_scaff07_1652772-1649115
scaffold_7	Ty3-gypsy	1652775	1652988	-	Name=fam506-2621_scaff07_1652988-1652775
scaffold_7	Ty3-gypsy	1652776	1653032	-	Name=fam506-2567_scaff03_1652776-1653032
scaffold_7	LTR retrotransposon	1654131	1654465	-	Name=fam328-2408_scaff13_1654131-1654465
scaffold_7	LTR retrotransposon	1655369	1657105	-	Name=fam328-2351_scaff07_1655369-1657105
scaffold_7	LTR retrotransposon	1655939	1658287	-	Name=fam328-2354_scaff08_1655939-1658287
scaffold_7	LTR retrotransposon	1655952	1656304	-	Name=fam328-1456_scaff07_1656304-1655952
scaffold_7	Ty3-gypsy	1661238	1661461	+	Name=fam471-2337_scaff01_1661238-1661461
scaffold_7	Unclassified	1661347	1661838	-	Name=fam214-1243_scaff06_1661347-1661838
scaffold_7	Unclassified	1661351	1662049	-	Name=fam214-1115_scaff05_1661351-1662049
scaffold_7	Unclassified	1662041	1662581	-	Name=fam214-320_scaff02_1662041-1662581
scaffold_7	Unclassified	1662118	1662578	-	Name=fam214-1459_scaff07_1662578-1662118
scaffold_7	LTR retrotransposon	1662577	1666056	+	Name=fam328-2353_scaff07_1662577-1666056
scaffold_7	LTR retrotransposon	1665707	1666135	+	Name=fam328-1516_scaff08_1665707-1666135
scaffold_7	Helitron-like	1666057	1669905	+	Name=fam176-1461_scaff07_1666057-1669905
scaffold_7	solo-LTR	1669901	1670425	-	Name=fam218-2481_scaff07_1670425-1669901
scaffold_7	Ty1-copia	1670427	1676659	-	Name=fam181-2482_scaff07_1676659-1670427
scaffold_7	solo-LTR	1676662	1677182	-	Name=fam218-2483_scaff07_1677182-1676662
scaffold_7	Unclassified	1677186	1677417	+	Name=fam183-2485_scaff07_1677186-1677417
scaffold_7	Unclassified	1739793	1740373	-	Name=fam469-1468_scaff07_1740373-1739793
scaffold_7	Unclassified	2102304	2102818	+	Name=fam317-2690_scaff07_2102304-2102818
scaffold_7	Unclassified	2105047	2105958	+	Name=fam317-1489_scaff07_2105047-2106062
scaffold_8	Unclassified	233792	234362	+	Name=fam469-1509_scaff08_233792-234362
scaffold_8	Unclassified	265709	265982	+	Name=fam647-1510_scaff08_265709-265982
scaffold_8	Unclassified	266619	266844	-	Name=fam214-2574_scaff02_266619-2666844
scaffold_8	LTR retrotransposon	268341	269589	+	Name=fam328-1516_scaff08_268341-269589
scaffold_8	Unclassified	269598	270121	+	Name=fam183-2488_scaff08_269598-270121
scaffold_8	Unclassified	270135	270476	+	Name=fam183-2490_scaff08_270135-270476
scaffold_8	Unclassified	270487	271265	-	Name=fam183-2492_scaff08_271265-270487
scaffold_8	LTR retrotransposon	271266	272646	+	Name=fam328-1519_scaff08_271266-272646
scaffold_8	LTR retrotransposon	272649	273859	+	Name=fam328-1520_scaff08_272649-273859
scaffold_8	solo-LTR	273864	274387	+	Name=fam218-2493_scaff08_273864-274387
scaffold_8	Unclassified	274397	275182	-	Name=fam183-2494_scaff08_275182-274397
scaffold_8	Ty3-gypsy	275605	285125	-	Name=fam471-2337_scaff01_275605-285125
scaffold_8	Ty3-gypsy	283126	287511	-	Name=fam471-2337_scaff01_283126-287511
scaffold_8	LTR retrotransposon	287499	298272	+	Name=fam328-2354_scaff08_287499-298272
scaffold_8	Unclassified	298362	299329	-	Name=fam744-2390_scaff08_299329-298362
scaffold_8	LTR retrotransposon	300043	301996	+	Name=fam328-1530_scaff08_300043-301996
scaffold_8	LTR retrotransposon	301575	302500	+	Name=fam328-2355_scaff08_301575-302500
scaffold_8	LTR retrotransposon	302144	302670	+	Name=fam328-2352_scaff07_302144-302670
scaffold_8	Ty3-gypsy	302503	303130	-	Name=fam471-2356_scaff08_303130-302503
scaffold_8	Unclassified	691462	691796	+	Name=fam469-2414_scaff11_691462-691796
scaffold_8	Unclassified	691596	691874	+	Name=fam469-1558_scaff08_691596-691874
scaffold_8	Unclassified	983331	983895	+	Name=fam653-1588_scaff08_983331-983895
scaffold_9	Unclassified	352571	352985	-	Name=fam647-2101_scaff12_352571-352985
scaffold_9	Ty3-gypsy	353008	353223	-	Name=fam506-2596_scaff09_353223-353008
scaffold_9	Unclassified	353544	354332	-	Name=fam183-2495_scaff09_354332-353544
scaffold_9	LTR retrotransposon	355208	357703	-	Name=fam328-1683_scaff09_357703-355208
scaffold_9	Unclassified	357704	358716	-	Name=fam744-2391_scaff09_358716-357704
scaffold_9	LTR retrotransposon	358718	359548	-	Name=fam328-1685_scaff09_359548-358718
scaffold_9	Helitron-like	359549	359946	+	Name=fam176-2564_scaff09_359549-359946
scaffold_9	Unclassified	359947	360490	+	Name=fam744-1687_scaff09_359947-360490
scaffold_9	Unclassified	360991	361958	+	Name=fam744-2392_scaff09_360991-361958
scaffold_9	Helitron-like	361960	385061	+	Name=fam176-2565_scaff09_361960-385061
scaffold_9	LTR retrotransposon	385063	385972	-	Name=fam328-1690_scaff09_385972-385063
scaffold_9	Unclassified	385972	386963	-	Name=fam744-2394_scaff09_386963-385972
scaffold_9	Unclassified	387239	387774	-	Name=fam744-1692_scaff09_387774-387239
scaffold_9	LTR retrotransposon	387781	389096	-	Name=fam328-1693_scaff09_389096-387781
scaffold_9	LTR retrotransposon	389094	395851	-	Name=fam328-2357_scaff09_395851-389094
scaffold_9	Ty1-copia	396836	397182	-	Name=fam181-2459_scaff04_396836-397182
scaffold_9	Unclassified	397186	397951	+	Name=fam183-1697_scaff09_397186-397951
scaffold_9	Ty1-copia	397957	398217	-	Name=fam181-1698_scaff09_398217-397957
scaffold_9	Ty1-copia	398223	398735	-	Name=fam181-1699_scaff09_398735-398223
scaffold_9	Ty1-copia	400041	401626	-	Name=fam181-1703_scaff09_401626-400041
scaffold_9	Ty1-copia	401187	401708	-	Name=fam181-2531_scaff01_401187-401708
scaffold_9	Unclassified	401628	402157	-	Name=fam183-1704_scaff09_402157-401628
scaffold_9	Unclassified	402599	403138	+	Name=fam647-2545_scaff01_402599-403138
scaffold_9	Unclassified	403137	403495	+	Name=fam647-1708_scaff09_403137-403495
scaffold_9	Tc1-mariner	469118	469621	-	Name=fam103-2436_scaff09_469621-469118
scaffold_9	Tc1-mariner	469619	472657	+	Name=fam103-1711_scaff09_469619-472657
scaffold_9	Tc1-mariner	472654	473063	-	Name=fam103-1712_scaff09_473063-472654
scaffold_9	Ty3-gypsy	473066	485512	+	Name=fam471-2358_scaff09_473066-485512
scaffold_9	Tc1-mariner	485514	488645	-	Name=fam103-2432_scaff09_488645-485514
scaffold_9	MITE	1297114	1297433	-	Name=fam414-1762_scaff09_1297433-1297114
scaffold_9	Unclassified	1755510	1756067	+	Name=fam317-1779_scaff09_1755510-1756067
scaffold_9	Unclassified	1756965	1757434	+	Name=fam317-1780_scaff09_1756965-1757434
scaffold_9	Unclassified	1757255	1757458	+	Name=fam317-903_scaff04_1757255-1757458
